# Supplementary material for: The dynamic mechanism of RASSF5 and MST kinase activation by Ras
Source: Royal Society of Chemistry journal article supplement (doi:10.1039/c6cp08596b), 2017-01-01
Supplement: c6cp08596b1.pdf [file c6cp08596b1.pdf]

**(a)** ————— RASSF5 with straight SARAH —————

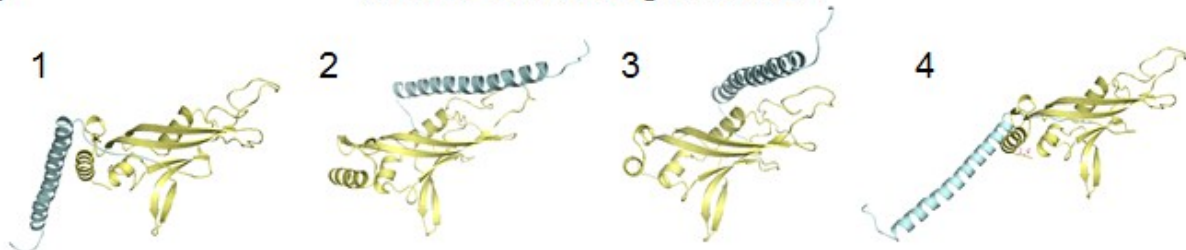

**(b)** ————— RASSF5 with KS1 model —————

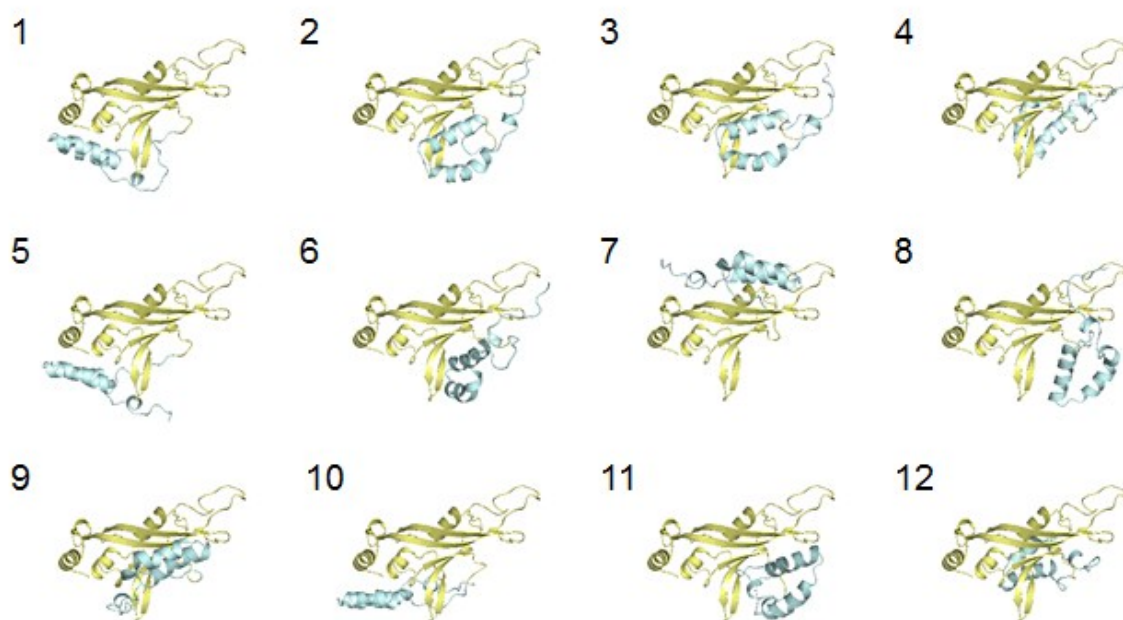

(c) ————— RASSF5 with KS2 model —————

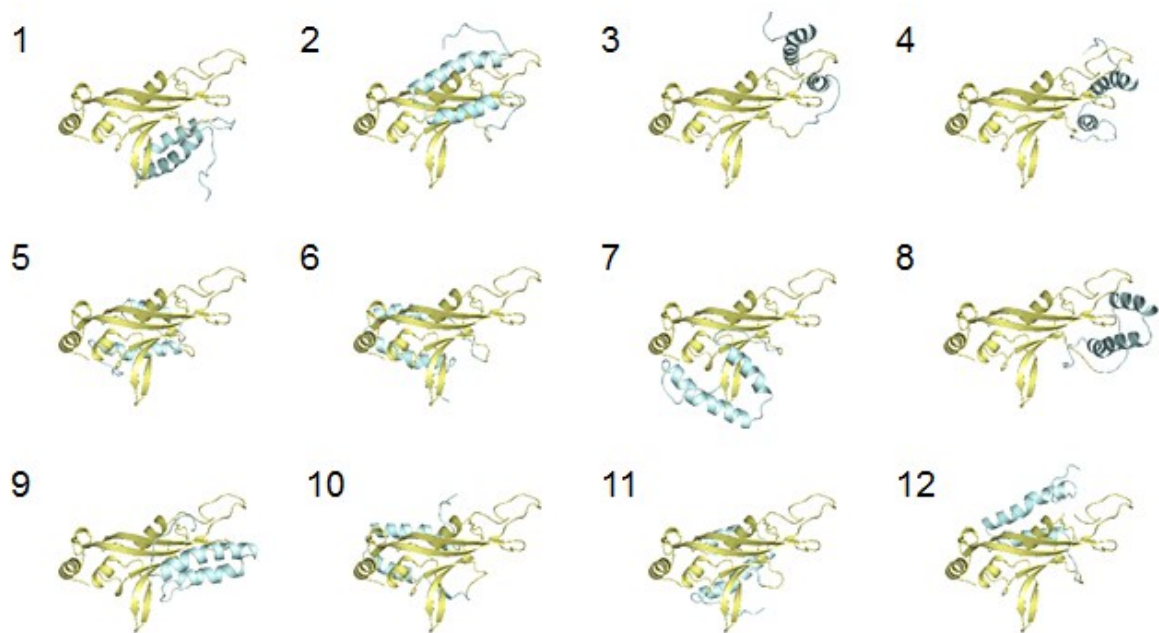

(d) ————— RASSF5 with KS3 model —————

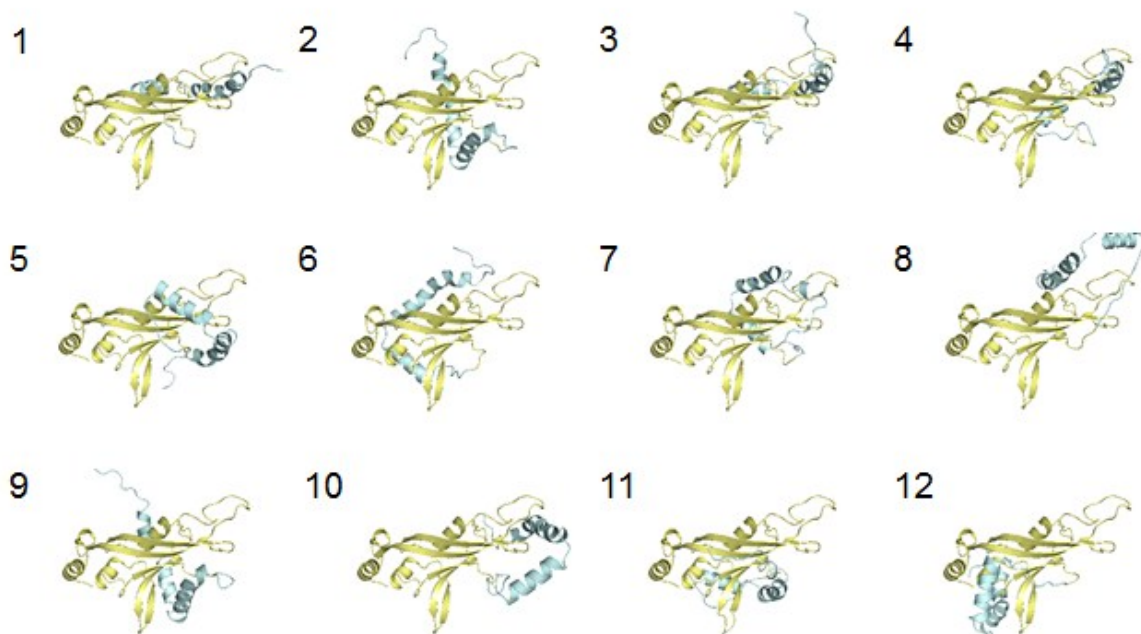

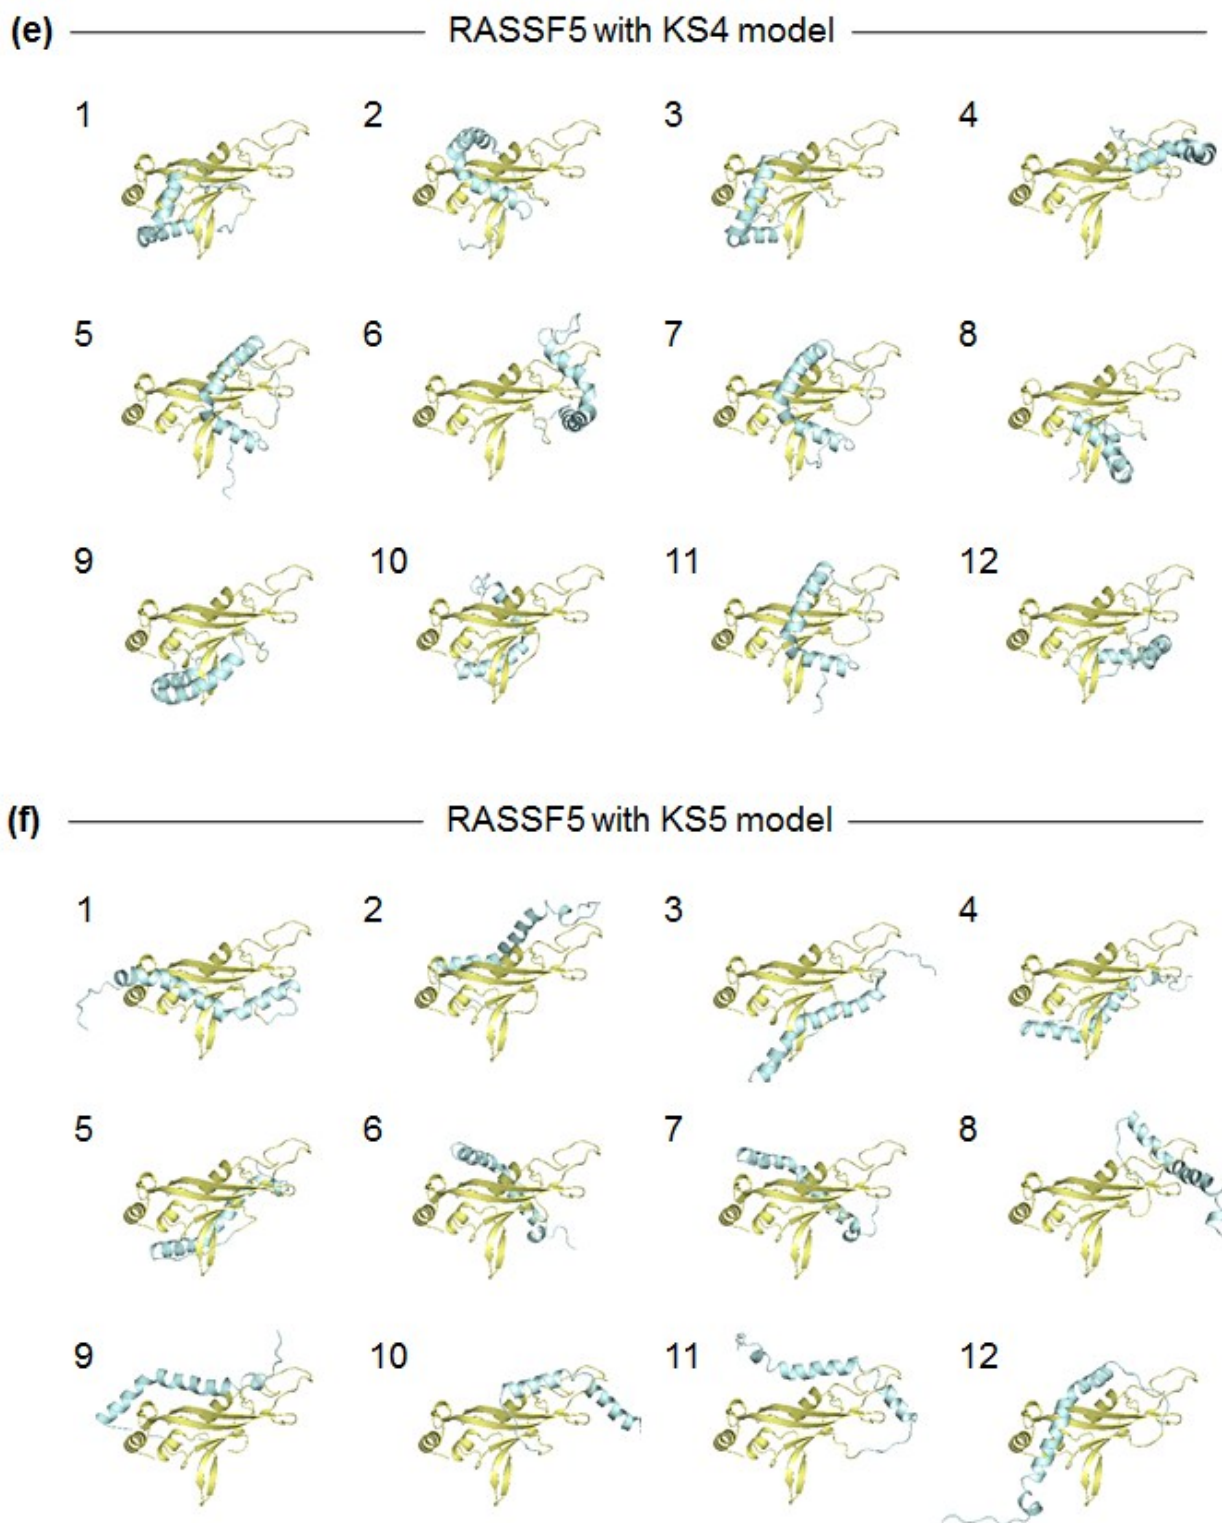

Fig. S1 Predicted RASSF5 decoys from (a) the PRISM server with straight SARAH and the Patchdock server with the kinked SARAH models of (b) KS1, (c) KS2, (d) KS3, (e) KS4, and (f) KS5.

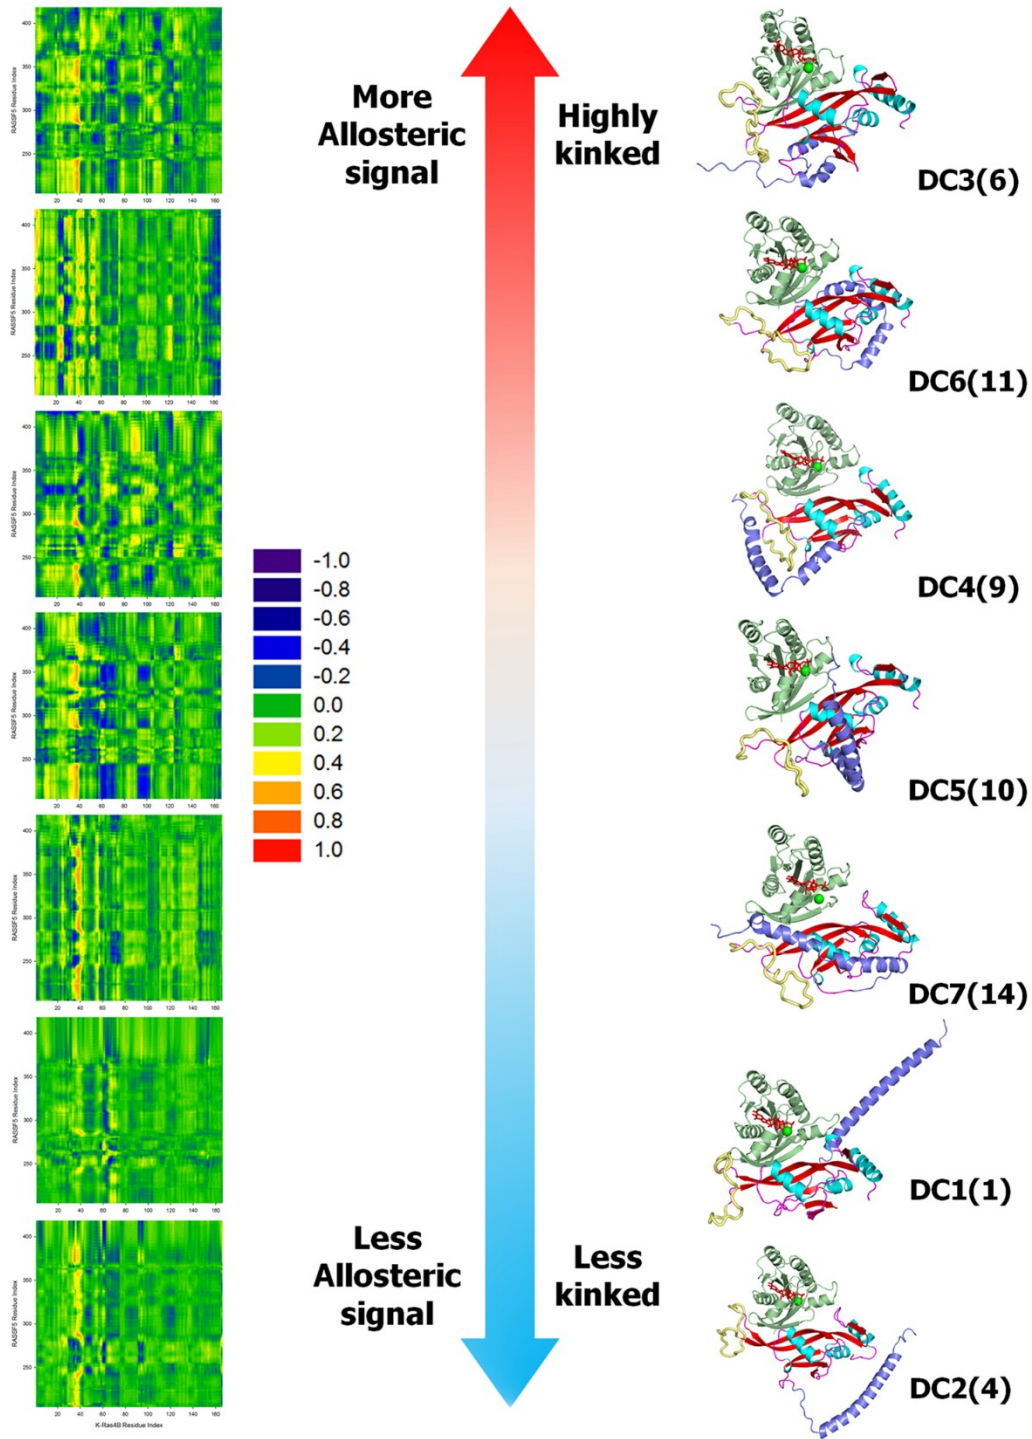

Fig. S2 The configurations with highly kinked SARAH show the strong residue correlations with K-Ras4B-GTP. In contrast, straight SARAH (the least kinked) has less correlation with K-Ras4B-GTP. The RASSF5 structures with K-Ras4B-GTP are shown in the order of highly kinked on the left (DC3(6)) to less kinked or straight on the right (DC1(1), DC2(4)) SARAH. For the kinked SARAH models, the dynamical cross-correlation maps (DCCMs) shows strong residue correlations between K-Ras4B allosteric lobe and SARAH, which suggests that the allosteric signals are transmitted to release SARAH, activating RASSF5. With less kinked or straight SARAH, the signals from either allosteric lobe or effective lobe become weaker and eventually disappear when SARAH is fully stretched.

Table S1 Types of atomic interactions in the SARAH dimers. The atomic pair indicates monomer 1 – monomer 2 residue pair in the interface. The pairs will be viewed effective and counted when the residue pairs have more than 50 % occurrence rate.

| Configuration                       | Salt bridge                                                           | Nonpolar                                                                                                                                                                                                                                                                                                                                                                                                                                                                                                                                                                                                        | Polar                       | H-bond |
|-------------------------------------|-----------------------------------------------------------------------|-----------------------------------------------------------------------------------------------------------------------------------------------------------------------------------------------------------------------------------------------------------------------------------------------------------------------------------------------------------------------------------------------------------------------------------------------------------------------------------------------------------------------------------------------------------------------------------------------------------------|-----------------------------|--------|
| <b>RASSF5-MST2<br/>hetero-SARAH</b> | E385 - R474, E388 - R467,<br>E388 - R474, K398 - E462,<br>R403 - D456 | I374 - M481, L377 - I477,<br>L377 - A480, L377 - M481,<br>F380 - I477, L381 - I477,<br>L381 - L478, L381 - M481,<br>L384 - I477, I392 - M459,<br>I392 - I463, I392 - L466,<br>V395 - M459, V395 - I463,<br>V395 - L466, F402 - F437,<br>F402 - F439, F402 - L440,<br>F402 - L455, F402 - M458,<br>L406 - F437, L406 - L440,<br>L406 - L443, L406 - L448,<br>L406 - L452, L406 - L455,<br>A409 - L440, A409 - L443,<br>A409 - L448                                                                                                                                                                               | S373 - Q489                 | NA     |
| <b>MST2-MST2<br/>homo-SARAH</b>     | D456 - R474, E462 - R469<br>R469 - E462, R474 - D456                  | F437 - P476, F437 - I477,<br>F437 - A480, L440 - P476,<br>L440 - I477, L440 - A480,<br>L443 - I477, L443 - A480,<br>L445 - M481, L448 - I477,<br>L448 - A480, L448 - M481,<br>L452 - I477, L452 - L478,<br>L452 - M481, L455 - I477,<br>M459 - I463, M459 - L466,<br>I463 - M459, I463 - I463,<br>I463 - L466, L466 - M458,<br>L466 - M459, L466 - I463,<br>L466 - L466, P476 - F437,<br>P476 - L440, I477 - F437,<br>I477 - L440, I477 - L443,<br>I477 - L448, I477 - L452,<br>I477 - L455, L478 - L452,<br>A480 - F437, A480 - L440,<br>A480 - L443, A480 - L448,<br>M481 - L445, M481 - L448,<br>M481 - L452 | NA                          | NA     |
| <b>RASSF5-RASSF5<br/>homo-SARAH</b> | E385 - R403, E388 - R403,<br>R403 - E388                              | L377 - L406, L377 - A409,<br>F380 - F402, F380 - L406,<br>F380 - A409, L381 - L406,<br>L384 - F402, L384 - L406,<br>I392 - I392, I392 - V395,<br>V395 - I392, V395 - V395,<br>F402 - F380, F402 - L384                                                                                                                                                                                                                                                                                                                                                                                                          | Q389 - Q396,<br>Q396 - Q389 | NA     |

Continued  
Configuration

Salt bridge

Nonpolar

Polar

H-bond

|                                                               |                                                  |                                                                                                                                                                                                                                                                                                                                                                                                                                                                                                                                 |                                     |           |
|---------------------------------------------------------------|--------------------------------------------------|---------------------------------------------------------------------------------------------------------------------------------------------------------------------------------------------------------------------------------------------------------------------------------------------------------------------------------------------------------------------------------------------------------------------------------------------------------------------------------------------------------------------------------|-------------------------------------|-----------|
| <p><b>RASSF5(E388A)-<br/>MST2<br/>hetero-SARAH</b></p>        | <p>E385 - R474, K398 - E462,<br/>R403 - D456</p> | <p>I374 - M481, L377 - I477,<br/>L377 - A480, L377 - M481,<br/>F380 - I477, L381 - I477,<br/>L381 - L478, L381 - M481,<br/>L384 - I477, A388 - L466,<br/>I392 - M459, I392 - I463,<br/>I392 - L466, V395 - M459,<br/>V395 - I463, V395 - L466,<br/>F402 - F437, F402 - F439,<br/>F402 - L440, F402 - L455,<br/>F402 - M458, L406 - F437,<br/>L406 - F439, L406 - L440,<br/>L406 - L443, L406 - L448,<br/>L406 - L452, L406 - L455,<br/>A409 - L440, A409 - L443,<br/>A409 - L448, L410 - L445,<br/>L410 - L448, L410 - L452</p> | <p>S373 - N490</p>                  | <p>NA</p> |
| <p><b>RASSF5(E388K)-<br/>MST2<br/>hetero-SARAH</b></p>        | <p>E385 - R474, K398 - E462,<br/>R403 - D456</p> | <p>I374 - M481, L377 - I477,<br/>L377 - A480, L377 - M481,<br/>F380 - I477, L381 - I477,<br/>L381 - L478, L381 - M481,<br/>L384 - I477, I392 - M459,<br/>I392 - I463, I392 - L466,<br/>V395 - M459, V395 - I463,<br/>V395 - L466, F402 - F437,<br/>F402 - F439, F402 - L440,<br/>F402 - L455, F402 - M458,<br/>L406 - F437, L406 - L440,<br/>L406 - L443, L406 - L448,<br/>L406 - L452, L406 - L455,<br/>A409 - L440, A409 - L448,<br/>L410 - L445, L410 - L448,<br/>L410 - L452</p>                                            | <p>S373 - N490</p>                  | <p>NA</p> |
| <p><b>RASSF5(E388A)-<br/>RASSF5(E388A)<br/>homo-SARAH</b></p> | <p>R403 - E385</p>                               | <p>I374 - L410, L377 - L406,<br/>L377 - L410, F380 - F402,<br/>F380 - L406, F380 - L410,<br/>L381 - L406, L381 - L410,<br/>L384 - F402, L384 - L406,<br/>A388 - V395, I392 - I392,<br/>I392 - V395, V395 - A388,<br/>V395 - I392, V395 - V395,<br/>F402 - F380, F402 - L384,<br/>L406 - I374, L406 - L377,<br/>L406 - F380, L406 - L381,<br/>L406 - L384, A409 - I374,<br/>A409 - L377, A409 - F380,<br/>L410 - I374, L410 - P375,<br/>L410 - L377, L410 - F380,<br/>L410 - L381</p>                                            | <p>Q389 - Q396,<br/>Q396 - Q389</p> | <p>NA</p> |
| <p><b>RASSF5(E388K)-<br/>RASSF5(E388K)<br/>homo-SARAH</b></p> | <p>E385 - R403, D400 - K388,<br/>K388 - D400</p> | <p>I374 - L406, I374 - A409,<br/>I374 - L410, P375 - L410,<br/>L377 - L406, L377 - A409,<br/>L377 - L410, F380 - F402,<br/>F380 - L406, F380 - L410,<br/>L381 - L406, L381 - L410,<br/>L384 - F402, L384 - L406,<br/>I392 - I392, I392 - V395,<br/>V395 - I392, V395 - V395,<br/>F402 - F380, F402 - L384,<br/>L406 - I374, L406 - L377,<br/>L406 - F380, L406 - L381,<br/>L406 - L384, A409 - L377,<br/>A409 - F380, L410 - I374,<br/>L410 - P375, L410 - L377,<br/>L410 - F380, L410 - L381</p>                               | <p>Q389 - Q396,<br/>Q396 - Q389</p> | <p>NA</p> |

Table S2 Types of atomic interactions in the SARAH dimers. The results of replica exchange molecular dynamics (REMD) simulations of SARAH monomer show that the sum of straight and one kinked SARAH domain have about 90% population across 300 K to 360 K. To consider the most probable RASSF5 configurations, we used straight and one kinked SARAH for docking and modeling.

| <b>Number of kink</b> | <b>Number of structure</b> | <b>Percentage</b> | <b>Kink residue</b>  |
|-----------------------|----------------------------|-------------------|----------------------|
| Fully unfolded        | 646                        | 1.077%            | NA                   |
| 0                     | 23945                      | 39.908%           | NA                   |
| 1                     | 30512                      | 50.853%           | E388                 |
| 2                     | 4677                       | 7.795%            | E388<br>K398         |
| 3                     | 219                        | 0.365%            | Q378<br>E388<br>Y399 |
| 4                     | 1                          | 0.002%            | NA                   |



Table S3 Types of atomic interactions in the RA-SARAH association for the RASSF5 configurations 1-14. The atomic pair indicates RA – SARAH residue pair in the interface. The pairs will be viewed effective and counted when the residue pairs have more than 50 % occurrence rate. Letters in *italic* denote the cation- $\pi$  interaction.

| RASSF5 configuration | Salt bridge                                                                               | Nonpolar                                                                                                                                                                                                                                                                                                                                                                                                                                                                                                     | Polar                                                           | H-bond |
|----------------------|-------------------------------------------------------------------------------------------|--------------------------------------------------------------------------------------------------------------------------------------------------------------------------------------------------------------------------------------------------------------------------------------------------------------------------------------------------------------------------------------------------------------------------------------------------------------------------------------------------------------|-----------------------------------------------------------------|--------|
| <b>Config. 1</b>     | K214 - E387, R221 - D370, R221 - E376, K223 - D370, K223 - E376, K241 - E366, K241 - E368 | I215 - L381, I215 - L384, M228 - L377, L230 - I383, L230 - L384, I287 - V367, V354 - F380                                                                                                                                                                                                                                                                                                                                                                                                                    | Q209 - Q394, Q213 - Q394, T220 - Q378, T220 - N379, T220 - T382 | NA     |
| <b>Config. 2</b>     | R257 - D400, R257 - E407, K307 - E387, K307 - D390, K334 - E366, K334 - E368              | V252 - F402, V252 - L406, P253 - F402, P253 - L406, A254 - F402, A254 - L406, I256 - L406, I256 - A409, I256 - L410, P258 - F402, P258 - L406, P258 - L410, I261 - I392, I261 - V395, V298 - W369, I302 - W369, M310 - V395, M310 - F402, V311 - V395, V312 - I392, V312 - V395, P315 - F380, P315 - L384, A319 - V367, A319 - W369, I337 - V367, I337 - W369, I337 - A371, I337 - F372, I337 - F380, A338 - W369, A338 - A371, A338 - F372, A338 - F380                                                     | Q259 - Q396, Q259 - Y399, S260 - Q396, S260 - Y399, Y262 - Y399 | NA     |
| <b>Config. 3</b>     | R257 - E388, K266 - E385, K266 - E388, K307 - E387, K308 - E387, K334 - E368              | I256 - I392, I256 - V395, P258 - I392, P258 - V395, V268 - F372, V268 - I374, V268 - L377, V268 - F380, V268 - L381, V268 - L384, L270 - V367, L270 - W369, L270 - A371, L270 - F372, L270 - I374, L270 - L377, A272 - V367, A272 - W369, V298 - W369, I302 - W369, L306 - W369, L306 - F380, L306 - L384, M310 - L384, V311 - F380, V311 - L384, V312 - F380, V312 - L381, V312 - L384, P315 - W369, P315 - A371, P315 - F372, P315 - L377, P315 - F380, F318 - W369, A319 - W369, L320 - W369, I337 - W369 | NA                                                              | NA     |
| <b>Config. 4</b>     | K212 - E387, E232 - K391, D233 - K391, K334 - E368, R340 - D370, R340 - E376              | L208 - L377, L208 - F380, L208 - L381, L208 - I383, L208 - L384, I211 - I383, L230 - I383, V298 - W369, I302 - V367, I302 - W369, P315 - W369, F318 - V367, A319 - V367, L331 - W369, I337 - V367, I337 - W369, I337 - A371, I337 - F372, A338 - W369, A338 - A371, A338 - F372, A338 - L377                                                                                                                                                                                                                 | T295 - N379, Y343 - N379                                        | NA     |

Continued  
RASSF5 configuration

|                  | Salt bridge                                                                                                                     | Nonpolar                                                                                                                                                                                                                                                                                                                                                                                                                                                                                                                                                                                                                                                  | Polar                                                                                                                                                                                       | H-bond                                      |
|------------------|---------------------------------------------------------------------------------------------------------------------------------|-----------------------------------------------------------------------------------------------------------------------------------------------------------------------------------------------------------------------------------------------------------------------------------------------------------------------------------------------------------------------------------------------------------------------------------------------------------------------------------------------------------------------------------------------------------------------------------------------------------------------------------------------------------|---------------------------------------------------------------------------------------------------------------------------------------------------------------------------------------------|---------------------------------------------|
| <b>Config. 5</b> | K214 - E387, K322 - D370,<br>K326 - E376, K334 - D370,<br>R340 - E387                                                           | F321 - V367, F321 - W369,<br>F321 - P417, F332 - V367,<br>L335 - W369, I337 - W369,<br>I337 - F372, I337 - L377,<br>I337 - F380, I337 - I383,<br>I337 - L384, I337 - V395,<br>A338 - F380, A338 - I383,<br>A338 - L384, L347 - F380,<br>L347 - I383, L347 - F402,<br>A348 - I383, P350 - I383,<br>V354 - I383                                                                                                                                                                                                                                                                                                                                             | Q213 - Q389,<br>S217 - Q389,<br>T297 - Q389,<br>H325 - N379,<br>Q329 - Q414,<br>Y343 - Y399                                                                                                 | NA                                          |
| <b>Config. 6</b> | K245 - E376, R247 - D370,<br>R277 - D370, R323 - E387,<br>K334 - E366, K334 - E368,<br>K334 - D370, K360 - E376,<br>E353 - K386 | L246 - W369, L246 - P375,<br>V250 - L410, F280 - A409,<br>F280 - L410, L282 - A409,<br>L282 - L410, P283 - I374,<br>P283 - P375, P283 - L406,<br>P283 - A409, P283 - L410,<br>L284 - P375, F321 - W369,<br>F321 - F372, V330 - F372,<br>V330 - F380, V330 - I383,<br>V330 - L384, V330 - F402,<br>L331 - W369, L331 - F372,<br>L331 - F380, L331 - F402,<br>F332 - V367, F332 - W369,<br>F332 - F372, F332 - F380,<br>F332 - I383, F332 - F402,<br>V358 - W369                                                                                                                                                                                            | H243 - N379,<br>T251 - S413,<br>Y262 - K416,<br>Y281 - S373,<br>Y281 - Q404,<br>H325 - N379,<br>H325 - Q389,<br>Q329 - Q389,<br>Q329 - Y399                                                 | Y281 - E408,<br>Y281 - L410                 |
| <b>Config. 7</b> | K245 - E407, R247 - E366,<br>R323 - D400, K334 - E385,<br>K360 - E366                                                           | I265 - F372, V268 - F372,<br>L270 - A371, L270 - F372,<br>L270 - I374, L270 - P375,<br>A271 - P375, A272 - I374,<br>A272 - P375, F280 - A409,<br>L282 - A409, P283 - L406,<br>P283 - A409, F321 - F380,<br>L331 - I392, I337 - L381                                                                                                                                                                                                                                                                                                                                                                                                                       | T273 - Q378,<br>T274 - Q378,<br>Q329 - Q393,<br>Q329 - Q394,<br>Q333 - Q389,<br>Q333 - Q393,<br>Q333 - Q396,<br>Q333 - Y399,<br>N362 - Q378,<br>N362 - Y399,<br>T364 - S373,<br>T364 - Q378 | F332 - Q396                                 |
| <b>Config. 8</b> | K223 - E388, R247 - E368,<br>R248 - E407, R257 - E366,<br>R257 - D370, R323 - E385,<br>E353 - K386                              | V250 - F372, V250 - L406,<br>V250 - A409, V250 - L410,<br>V252 - F372, V252 - L406,<br>V252 - A409, V252 - L410,<br>P253 - F372, P253 - L406,<br>P253 - A409, P253 - L410,<br>A254 - F372, A254 - A409,<br>A254 - L410, I256 - W369,<br>P258 - W369, P258 - A409,<br>F280 - W369, F280 - A371,<br>F280 - F372, F280 - L406,<br>F280 - L410, L282 - A371,<br>L282 - F372, L282 - L377,<br>L282 - F402, L282 - L406,<br>L282 - L410, P283 - A371,<br>P283 - F372, P283 - I374,<br>P283 - L377, P283 - F380,<br>P283 - L381, L284 - F380,<br>L284 - F402, A286 - F380,<br>A286 - L381, A286 - L384,<br>A286 - I392, I287 - L381,<br>I287 - L384, I287 - I392 | H243 - Q378,<br>Q289 - Q389,<br>Q289 - Q393                                                                                                                                                 | Y281 - D370,<br>Y281 - F372,<br>P283 - Y399 |

|                   | Salt bridge                                                                                                                                                                                                                                                                                   | Nonpolar                                                                                                                                                                                                                                                                                                                                                                                                                                                                                                                                                                                                                                                                                                                                                                                                                                                                             | Polar                                                                                                                                                                                                                                                                       | H-bond                                     |
|-------------------|-----------------------------------------------------------------------------------------------------------------------------------------------------------------------------------------------------------------------------------------------------------------------------------------------|--------------------------------------------------------------------------------------------------------------------------------------------------------------------------------------------------------------------------------------------------------------------------------------------------------------------------------------------------------------------------------------------------------------------------------------------------------------------------------------------------------------------------------------------------------------------------------------------------------------------------------------------------------------------------------------------------------------------------------------------------------------------------------------------------------------------------------------------------------------------------------------|-----------------------------------------------------------------------------------------------------------------------------------------------------------------------------------------------------------------------------------------------------------------------------|--------------------------------------------|
| <b>Config. 9</b>  | E267 - K391, E267 - K398,<br>K276 - D400, K276 - E407,<br>K307 - E376, K334 - E366                                                                                                                                                                                                            | P249 - F402, P249 - L406,<br>P249 - L410, V250 - L406,<br>V250 - L410, V252 - F402,<br>V252 - L406, V252 - A409,<br>V252 - L410, P253 - L406,<br>P253 - A409, P253 - L410,<br>A254 - L410, I256 - A409,<br>I256 - L410, I261 - F402,<br>I261 - L406, I261 - A409,<br>I261 - L410, A264 - F402,<br>I265 - V395, I265 - F402,<br>V268 - F372, V268 - F380,<br>V268 - I383, V268 - L384,<br>V268 - I392, V268 - V395,<br>L270 - F372, L270 - L377,<br>L270 - F380, L270 - L381,<br>L270 - I383, L270 - L384,<br>L270 - I392, L270 - V395,<br>A271 - F380, A271 - L381,<br>A271 - I383, A271 - L384,<br>A271 - I392, A271 - V395,<br>A272 - F380, F280 - L406,<br>F280 - L410, V298 - W369,<br>I302 - W369, I302 - A371,<br>L306 - F372, V312 - F380,<br>P315 - W369, P315 - A371,<br>P315 - F372, F318 - W369,<br>A319 - W369, L320 - W369,<br>I337 - V367, I337 - W369,<br>I337 - A371 | Y262 - Y399,<br>N269 - Q396,<br>N269 - Y399,<br>T273 - Q396,<br>T273 - Y399,<br>T274 - Q396,<br>T274 - Y399,<br>T278 - Q404,<br>S279 - Q404,<br>Y281 - Y399,<br>T297 - S373,<br>S299 - S373,<br>Q303 - S373,<br>N314 - Y399                                                 | T274 - R403,<br>Q316 -W369,<br>N362 - E366 |
| <b>Config. 10</b> | K245 - D370, K245 - E376,<br>R247 - E366, K266 - E407,<br>E267 - R403, E300 - K405,<br>R323 - E376, K334 - E387,<br>K360 - E376,                                                                                                                                                              | L246 - W369, A264 - L406,<br>A264 - L410, I265 - F402,<br>I265 - L406, I265 - L410,<br>V268 - L406, V268 - L410,<br>L270 - I392, L270 - L406,<br>L270 - L410, A272 - I392,<br>F280 - V367, F280 - F372,<br>L282 - F372, P283 - W369,<br>P283 - F372, P315 - F402,<br>P315 - L406, A319 - L384,<br>F321 - F380, F321 - I383,<br>F321 - L384, V330 - P375,<br>L331 - I383, F332 - F380,<br>F332 - I383, I337 - V395,<br>I337 - F402, A338 - F402,<br>V358 - F380                                                                                                                                                                                                                                                                                                                                                                                                                       | T235 - Q414,<br>N269 - Q393,<br>T274 - Q389,<br>Y281 - S373,<br>T295 - Q414,<br>S299 - Y399,<br>Q303 - Y399,<br>N314 - Q396,<br>N314 - Y399,<br>Q316 - Q396,<br>Q316 - Y399,<br>Q329 - N379,<br>Q333 - N379,<br>N362 - Q389,<br>N362 - Q396,<br>T364 - Q389,<br>T364 - Q393 | NA                                         |
| <b>Config. 11</b> | K214 - E385, R221 - E388,<br>K241 - E412, R247 - E366,<br>R323 - E412, K326 - E376,<br>K326 - E387, D327 - K386,<br>K334 - E366, K334 - D370,<br>D351 - K391, D351 - K398,<br>D351 - K401, E353 - K391,<br>E353 - K397, E353 - K398,<br>E353 - K401, E353 - K405,<br>K360 - E366, K360 - E368 | P206 - L381, V268 - W369,<br>L270 - V367, L270 - W369,<br>L270 - F372, A271 - V367,<br>A271 - F372, A272 - V367,<br>I287 - F402, I287 - L406,<br>I287 - A409, I287 - L410,<br>V298 - W369, I324 - L377,<br>I324 - F380, I324 - I383,<br>I324 - L384, L331 - W369,<br>L331 - F380, L331 - I383,<br>F332 - V367, F332 - W369,<br>L335 - F372, L335 - F380,<br>I337 - W369, L344 - L377,<br>L344 - F380, L344 - L381,<br>L344 - L384, L347 - L381,<br>L347 - L384, A348 - L384,<br>P350 - V395, V354 - I383,<br>V354 - L384, L355 - F380,<br>L355 - L384, F357 - F380                                                                                                                                                                                                                                                                                                                   | Q333 - S373                                                                                                                                                                                                                                                                 | T364 - E368                                |

Continued  
RASSF5 configuration

Salt bridge

Nonpolar

Polar

H-bond

|                   | Salt bridge                                                                                                                                  | Nonpolar                                                                                                                                                                                                                                                                                                                                                                                                                                                                                                                                              | Polar                                                                                                                                       | H-bond                      |
|-------------------|----------------------------------------------------------------------------------------------------------------------------------------------|-------------------------------------------------------------------------------------------------------------------------------------------------------------------------------------------------------------------------------------------------------------------------------------------------------------------------------------------------------------------------------------------------------------------------------------------------------------------------------------------------------------------------------------------------------|---------------------------------------------------------------------------------------------------------------------------------------------|-----------------------------|
| <b>Config. 12</b> | K245 - E412, K308 - E385,<br>K308 - E388, R323 - E412,<br>K334 - E366, E222 - K398,<br>E353 - K405                                           | L226 - V395, F239 - I383,<br>F239 - L384, V268 - I374,<br>L270 - A371, L270 - F372,<br>A271 - V367, A272 - V367,<br>A272 - W369, A286 - F402,<br>A286 - L406, I287 - F402,<br>I287 - L406, I287 - L410,<br>L290 - L377, L290 - F380,<br>L290 - L381, L290 - L384,<br>I292 - L377, I292 - F380,<br>V301 - L377, I302 - W369,<br>L305 - L381, L306 - W369,<br>P315 - W369, P315 - A371,<br>P315 - I374, F318 - W369,<br>A319 - W369, F332 - L410,<br>I337 - V367, I337 - W369,<br>I337 - F372, A338 - F372,<br>V358 - L410                              | N224 - Q394,<br>C225 - Q394,<br>Q289 - Y399,<br>Q303 - S373,<br>H325 - S413,<br>Q329 - S413,<br>T352 - S413                                 | Q316 - W369                 |
| <b>Config. 13</b> | K223 - E408, K245 - E387,<br>R247 - D370, R257 - E385,<br>R323 - E387, R323 - E388,<br>E222 - K398, D285 - K386,<br>D351 - K401, E353 - K401 | P253 - P375, A254 - P375,<br>I256 - I374, I256 - P375,<br>P258 - I383, I261 - I383,<br>A272 - V367, F280 - P375,<br>L282 - F380, L282 - I383,<br>P283 - F380, P283 - I383,<br>L284 - I383, V330 - V395                                                                                                                                                                                                                                                                                                                                                | N224 - S413,<br>H243 - Q394,<br>Q259 - N379,<br>Q259 - T382,<br>Y281 - N379,<br>H325 - Q394,<br>H325 - Y399,<br>T352 - Q394,<br>S356 - Q394 | Y281 - E376,<br>Y281 - N379 |
| <b>Config. 14</b> | K307 - E387, K307 - E388,<br>K307 - D390, K334 - E366,<br>R340 - E376                                                                        | I256 - L406, I256 - A409,<br>I256 - L410, P258 - F402,<br>P258 - L406, P258 - A409,<br>P258 - L410, I261 - V395,<br>I261 - F402, I261 - L406,<br>I261 - A409, A264 - V395,<br>A264 - F402, I265 - V395,<br>I265 - F402, V268 - I392,<br>V268 - V395, L270 - L384,<br>L270 - I392, L270 - V395,<br>V312 - V395, P315 - L384,<br>L335 - V367, L335 - W369,<br>I337 - V367, I337 - W369,<br>I337 - F372, I337 - L377,<br>I337 - F380, I337 - L381,<br>I337 - L384, A338 - W369,<br>A338 - A371, A338 - F372,<br>A338 - L377, A338 - F380,<br>A338 - L381 | T297 - N379                                                                                                                                 | NA                          |

Table S4 Types of atomic interactions in the RA-SARAH association for the K-Ras4B-GTP/RASSF5 dimeric configurations. The atomic pair indicates RA – SARAH residue pair in the interface. The pairs will be viewed effective and counted when the residue pairs have more than 50 % occurrence rate.

| Dimeric configuration | Salt bridge                                                                               | Nonpolar                                                                                                                                                                                                                                                                                                                                                                                                                                    | Polar                                                                                                                                                                                | H-bond      |
|-----------------------|-------------------------------------------------------------------------------------------|---------------------------------------------------------------------------------------------------------------------------------------------------------------------------------------------------------------------------------------------------------------------------------------------------------------------------------------------------------------------------------------------------------------------------------------------|--------------------------------------------------------------------------------------------------------------------------------------------------------------------------------------|-------------|
| <b>DC1(1)</b>         | K223 - E376, R323 - E366, R323 - E368, R323 - D370, K360 - E368                           | I287 - V367, I287 - W369, V330 - V367, V330 - W369, F332 - V367, P350 - F372                                                                                                                                                                                                                                                                                                                                                                | N219 - Q378, T220 - Q378, N224 - S373                                                                                                                                                | NA          |
| <b>DC2(4)</b>         | K322 - E376, K334 - E368, E210 - R411                                                     | P205 - F372, P205 - I374, P205 - I392, P206 - F372, P206 - I374, L208 - L381, L270 - V367, L270 - W369, A272 - V367, V298 - W369, I302 - W369, F318 - V367, A319 - V367, A319 - W369, I337 - V367, I337 - W369, I337 - A371, I337 - F372, I337 - I374, A338 - W369, A338 - A371, A338 - F372, A338 - I374, L344 - P375, L347 - P375, L347 - L377, L347 - L381, A348 - L377                                                                  | T207 - Q389, T207 - Q393, T207 - Q396, Q209 - Q389, Q209 - Q393, Q209 - Q396, Q209 - Q404, S336 - S373, S336 - Q378, Y343 - Q378, Y343 - T382                                        | NA          |
| <b>DC3(6)</b>         | K276 - E408, K276 - E412, R323 - E387, K334 - D370, K360 - E376, D327 - K398              | P283 - P375, I287 - I383, F321 - F372, V330 - F380, V330 - L384, V330 - V395, L331 - F380, L331 - V395, F332 - F372, F332 - L377, F332 - F380, V358 - F372                                                                                                                                                                                                                                                                                  | H243 - N379, T278 - S413, T278 - Q414, S279 - Q414, H325 - Q389, Q329 - Q394, Q333 - Y399                                                                                            | F332 - Y399 |
| <b>DC4(9)</b>         | K276 - E407, K276 - E408, K317 - E368, K334 - E366                                        | P249 - L410, V250 - L410, V252 - A409, V252 - L410, A254 - A409, A254 - L410, I256 - A409, I261 - A409, I261 - L410, A264 - F402, A264 - L406, I265 - F402, I265 - L406, V268 - F372, V268 - F380, V268 - I383, L270 - F380, L270 - I383, L270 - L384, L270 - I392, L270 - V395, A271 - F380, A271 - I392, A271 - V395, F280 - L410, I302 - A371, P315 - A371, P315 - F372, I337 - W369, I337 - A371, I337 - F372, I337 - I374, A338 - I374 | T251 - S413, T251 - Q414, S260 - S413, Y262 - Y399, N269 - Q396, N269 - Y399, T273 - Q396, T273 - Y399, T274 - Q396, T274 - Y399, T297 - S373, S299 - S373, Q303 - S373, N314 - Y399 | T274 - Y399 |
| <b>DC5(10)</b>        | K245 - E366, K245 - D370, K245 - E376, R323 - E376, K334 - E387, K360 - E366, K360 - E376 | L282 - V367, P283 - V367, P283 - F372, P315 - F402, F321 - F380, F321 - I383, V330 - F372, V330 - P375, F332 - F380, F332 - I383, I337 - V395                                                                                                                                                                                                                                                                                               | S299 - Y399, Q303 - Y399, N314 - Q396, N314 - Y399, Q316 - Q396, Q316 - Y399, Q333 - N379, Q333 - T382, N362 - Q389,                                                                 | NA          |

Continued  
Dimeric configuration

Salt bridge

Nonpolar

Polar

H-bond

| <p><b>DC6(11)</b></p> | <p>K214 - E385, K214 - E388,<br/>K241 - E407, K245 - E366,<br/>K326 - D370, K326 - E376,<br/>K360 - E366</p> | <p>L226 - L406, I287 - L406,<br/>I287 - A409, F321 - W369,<br/>I324 - L377, I324 - F380,<br/>L331 - W369, L331 - A371,<br/>F332 - V367, F332 - W369,<br/>L344 - L377, L344 - F380,<br/>L344 - L381, L344 - L384,<br/>L347 - F380, L347 - L381,<br/>L347 - L384, A348 - F380,<br/>A348 - L381, A348 - L384,<br/>G349 - L384, G349 - I392,<br/>P350 - I392, V354 - F380,<br/>V354 - I383, V354 - L384,<br/>L355 - L377, L355 - F380,<br/>L355 - L381, L355 - L384,<br/>F357 - L406</p>              | <p>NA</p>                                                                                                                                                                   | <p>NA</p>          |
|-----------------------|--------------------------------------------------------------------------------------------------------------|---------------------------------------------------------------------------------------------------------------------------------------------------------------------------------------------------------------------------------------------------------------------------------------------------------------------------------------------------------------------------------------------------------------------------------------------------------------------------------------------------|-----------------------------------------------------------------------------------------------------------------------------------------------------------------------------|--------------------|
| <p><b>DC7(14)</b></p> | <p>K307 - D390, K334 - E366,<br/>R340 - D370</p>                                                             | <p>P205 - A371, P205 - F372,<br/>P205 - I374, P205 - P375,<br/>L208 - P375, I211 - P375,<br/>P253 - L410, P253 - P417,<br/>A254 - P417, P258 - F402,<br/>P258 - L406, P258 - A409,<br/>P258 - L410, I261 - V395,<br/>I261 - F402, I261 - L406,<br/>I261 - L410, V268 - I392,<br/>L306 - I392, M310 - V395,<br/>M310 - F402, V311 - V395,<br/>V312 - I392, V312 - V395,<br/>P315 - I392, L335 - V367,<br/>I337 - V367, I337 - W369,<br/>A338 - W369, A338 - A371,<br/>A338 - F380, L344 - W369</p> | <p>T235 - S373,<br/>T235 - N379,<br/>T251 - S413,<br/>T251 - Q414,<br/>Q259 - Q414,<br/>S260 - Y399,<br/>S294 - S373,<br/>S294 - N379,<br/>T295 - S373,<br/>T295 - N379</p> | <p>S336 - W369</p> |

Table S5 The WISP calculates 100 desirable allosteric pathways between two selected residues for K-Ras4B-GTP/RASSF5 dimeric configurations, DC3(6), DC4(9), DC5(10), and DC7(14). The table shows the occurrence rate of each residue on the allosteric pathway. Except the source and sink residue which have the 100% occurrence rate, based on the results, the higher occurrence rate may imply the more importance.

| Dimeric configuration | K-Ras4B          |          | RASSF5     |          |               |          |
|-----------------------|------------------|----------|------------|----------|---------------|----------|
|                       | Residue          | Rate (%) | RA residue | Rate (%) | SARAH residue | Rate (%) |
| DC3(6)                | G13              | 12       |            |          |               |          |
|                       | V14              | 20       |            |          |               |          |
|                       | K16              | 3        |            |          |               |          |
|                       | S17              | 1        |            |          |               |          |
|                       | Q22              | 4        |            |          |               |          |
|                       | L23              | 4        |            |          |               |          |
|                       | F28              | 1        |            |          |               |          |
|                       | V29              | 4        |            |          |               |          |
|                       | Y32              | 44       |            |          |               |          |
|                       | D33              | 66       | K245       | 5        | N379          | 34       |
|                       | P34              | 8        | L246       | 5        | L381          | 34       |
|                       | T35              | 24       | D285       | 29       | T382          | 4        |
|                       | D38              | 25       | V301       | 66       | L384          | 14       |
|                       | S39              | 25       | G304       | 66       | E385          | 13       |
|                       | R41              | 4        | K308       | 66       | E387          | 58       |
|                       | K42              | 4        | M310       | 5        | E388          | 20       |
|                       | D57              | 1        | V311       | 5        | Q389          | 30       |
|                       | A83              | 25       | R323       | 66       | D390          | 30       |
|                       | I84              | 58       | Q329       | 7        | I392          | 59       |
|                       | N85              | 23       | V330       | 7        | V395          | 19       |
|                       | N116             | 1        | P341       | 66       | Q396          | 100      |
|                       | K117             | 79       | R345       | 66       | D400          | 100      |
|                       | D119             | 2        | L355       | 66       |               |          |
|                       | T124             | 15       |            |          |               |          |
|                       | V125             | 99       |            |          |               |          |
|                       | D126             | 100      |            |          |               |          |
| S145                  | 3                |          |            |          |               |          |
| A146                  | 1                |          |            |          |               |          |
| K147                  | 1                |          |            |          |               |          |
| GTP                   | 81               |          |            |          |               |          |
| Mg <sup>2+</sup>      | 15               |          |            |          |               |          |
| DC4(9)                | G13              | 28       |            |          |               |          |
|                       | V14              | 63       |            |          |               |          |
|                       | G15              | 4        | T237       | 58       |               |          |
|                       | S17              | 44       | G238       | 85       |               |          |
|                       | Y32              | 54       | F239       | 87       |               |          |
|                       | P34              | 55       | Q289       | 100      | S373          | 100      |
|                       | T35              | 45       | L290       | 13       | P375          | 100      |
|                       | I36              | 55       | H291       | 2        | N379          | 100      |
|                       | D38              | 100      | I292       | 68       | I383          | 100      |
|                       | A83              | 62       | S293       | 75       | E387          | 100      |
|                       | N86              | 2        | T296       | 100      |               |          |
|                       | S89              | 100      | T297       | 32       |               |          |
|                       | N116             | 2        | E300       | 68       |               |          |
|                       | K117             | 37       |            |          |               |          |
|                       | GTP              | 78       |            |          |               |          |
|                       | Mg <sup>2+</sup> | 44       |            |          |               |          |

Continued  
Dimeric configuration

*K-Ras4B*  
Residue Rate (%)

RA residue

*RASSF5*  
Rate (%) SARAH residue

Rate (%)

|                |                  |     |      |     |      |     |
|----------------|------------------|-----|------|-----|------|-----|
| <b>DC5(10)</b> | G15              | 8   |      |     | E387 | 100 |
|                | K16              | 30  | L306 | 6   | E388 | 98  |
|                | S17              | 78  | F309 | 100 | Q389 | 2   |
|                | Y40              | 100 | V311 | 97  | D390 | 18  |
|                | I55              | 2   | V312 | 33  | K391 | 93  |
|                | L56              | 100 | D313 | 94  | I392 | 9   |
|                | D57              | 77  | N314 | 4   | Q394 | 28  |
|                | T58              | 18  | P315 | 98  | V395 | 91  |
|                | GTP              | 16  | Q316 | 100 | Q396 | 11  |
|                | Mg <sup>2+</sup> | 48  |      |     |      |     |
| <b>DC6(11)</b> |                  |     | V242 | 29  |      |     |
|                |                  |     | H243 | 67  |      |     |
|                | S17              | 7   | L244 | 15  | D390 | 100 |
|                | T20              | 100 | D285 | 14  | K391 | 93  |
|                | L23              | 100 | A286 | 86  | I392 | 2   |
|                | T35              | 7   | I287 | 4   | Q393 | 3   |
|                | Y40              | 93  | R323 | 1   | Q394 | 8   |
|                | A59              | 7   | D351 | 19  | V395 | 4   |
|                | R68              | 4   | T352 | 16  | Q396 | 3   |
|                | D69              | 1   | E353 | 37  | Y399 | 4   |
|                | Q70              | 7   | V354 | 59  | D400 | 5   |
|                | Y71              | 3   | L355 | 76  | R403 | 2   |
|                | Mg <sup>2+</sup> | 7   | S356 | 86  | Q404 | 7   |
|                |                  |     | F357 | 63  |      |     |
|                |                  |     | V358 | 54  |      |     |
|                |                  |     | L359 | 5   |      |     |
| <b>DC7(14)</b> |                  |     | Y236 | 17  |      |     |
|                |                  |     | T237 | 25  |      |     |
|                |                  |     | G238 | 31  |      |     |
|                |                  |     | I240 | 50  |      |     |
|                |                  |     | V242 | 86  | S373 | 100 |
|                |                  |     | H243 | 2   | P375 | 14  |
|                |                  |     | I287 | 86  | E376 | 100 |
|                |                  |     | K288 | 11  | Q378 | 1   |
|                | D38              | 1   | L290 | 41  | N379 | 6   |
|                | S39              | 100 | H291 | 4   | T382 | 3   |
|                | Y40              | 4   | I292 | 67  | I383 | 1   |
|                |                  |     | S293 | 31  | K386 | 3   |
|                |                  |     | S294 | 92  | E388 | 3   |
|                |                  |     | T295 | 8   | K391 | 3   |
|                |                  |     | T296 | 12  | I392 | 3   |
|                |                  |     | T297 | 1   | V395 | 3   |
|                |                  |     | V301 | 9   |      |     |
|                |                  |     | F309 | 3   |      |     |
|                |                  |     | M310 | 3   |      |     |
|                |                  |     | L342 | 18  |      |     |
